# Supplementary material for: Facile synthesis of Gd(iii) metallosurfactant-functionalized carbon nanodots with high relaxivity as bimodal imaging probes
Source: Royal Society of Chemistry journal article supplement (doi:10.1039/c6ra02654k), 2016-01-01
Supplement: c6ra02654k1.pdf [file c6ra02654k1.pdf]

## Electronic Supporting Information

# Facile synthesis of Gd(III)-metallo-surfactant functionalized carbon nanodots with high relaxivity as bimodal imaging probes

Qin Zhu<sup>a</sup>, Fei Pan<sup>a</sup>, Yu Tian<sup>b</sup>, Weijun Tang<sup>c</sup>, Yuan Yuan<sup>b</sup>, Aiguo Hu<sup>a</sup>

<sup>a</sup> Shanghai Key Laboratory of Advanced Polymeric Materials, School of Materials Science and Engineering, East China University of Science and Technology, Shanghai, 200237, China. <sup>b</sup> The State Key Laboratory of Bioreactor Engineering East China University of Science and Technology, Shanghai, 200237, China. <sup>c</sup> Department of Radiology, Huashan Hospital Affiliated to Fudan University, Shanghai, 200040, China.

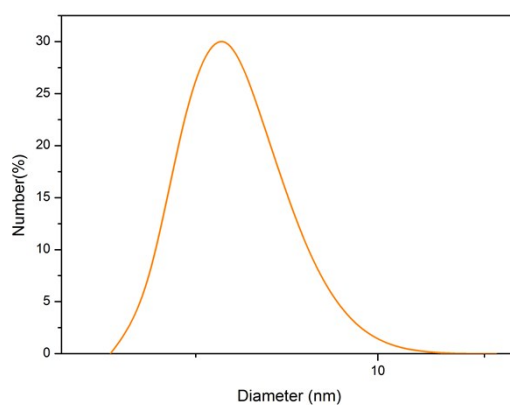

**Fig. S1** The DLS curve of MS.

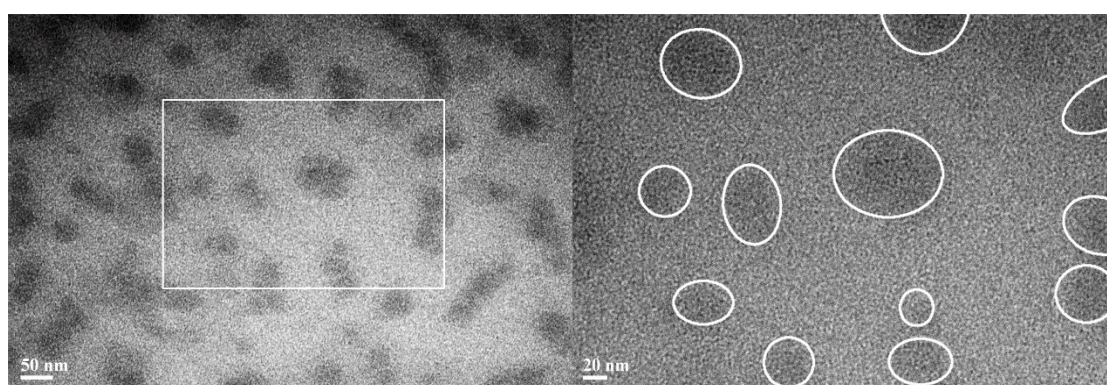

**Fig. S2** The TEM images of MS-CDs.

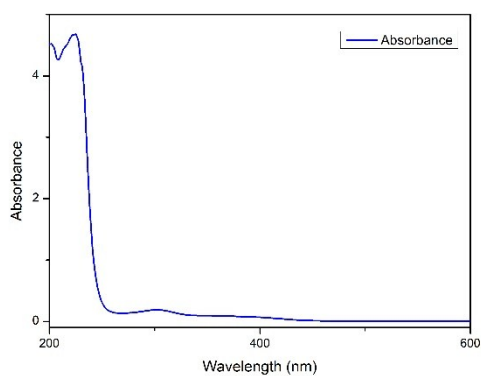

**Fig. S3** The UV-Vis absorbance spectrum of CDs.

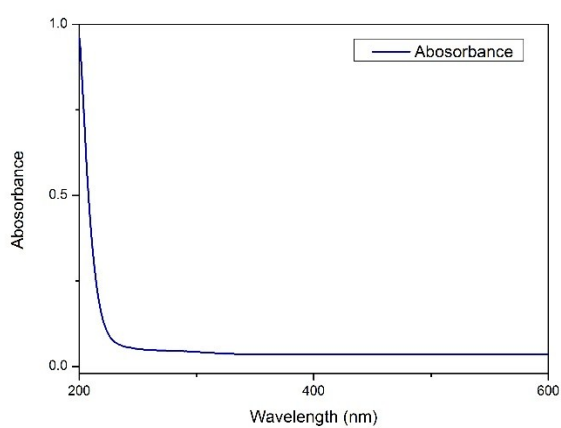

**Fig. S4** The UV-Vis absorbance spectrum of MS-CDs.

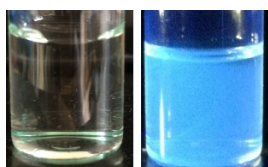

**Fig. S5** Photos of MS-CDs under natural light and 365 nm UV lamp.

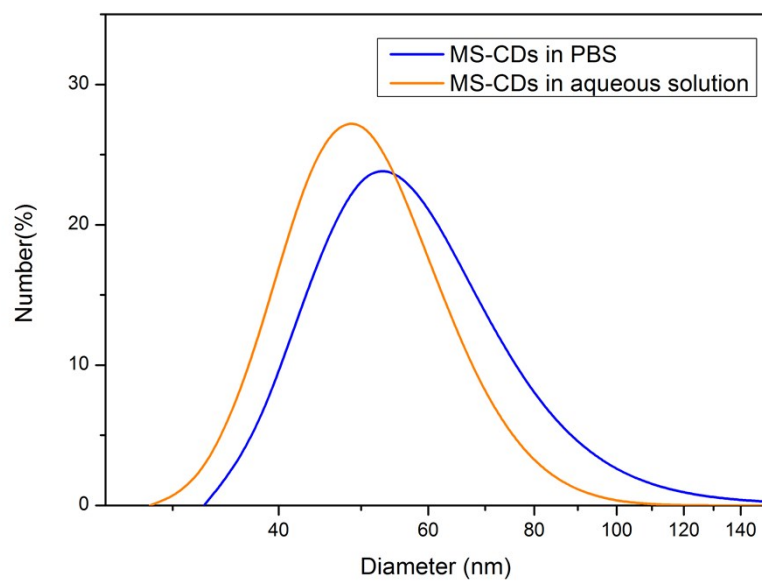

**Fig. S6** The stability of MS-CDs in PBS.

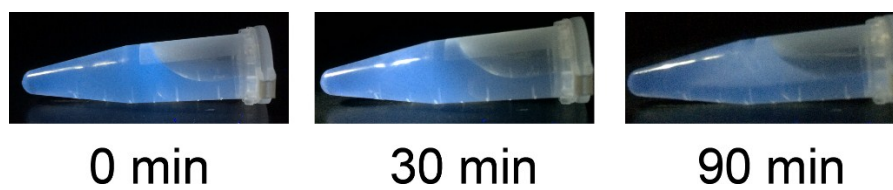

**Fig. S7** The photos of MS-CDs exposed continuously under 365 nm UV lamp.
